# Supplementary material for: The effects of the number of consecutive night shifts on sleep duration and quality
Source: PubMed Central journal article supplement (PMC8527589; doi:10.5271/sjweh.3885), 2020-07-01
Supplement: SJWEH-46-446-S001.pdf [file SJWEH-46-446-S001.pdf]

# The effects of the number of consecutive night shifts on sleep duration and quality<sup>1</sup>

by Anne Helene Garde, PhD,<sup>2</sup> Kirsten Nabe-Nielsen, PhD, Marie Aarrebo Jensen, PhD, Jesper Kristiansen, PhD, Jeppe Karl Sørensen, Cand scient san publ, Åse Marie Hansen, PhD, MD

1. Supplementary table

2. Correspondence to: Anne Helene Garde, The National Research Centre for the Working Environment, Lersø Parkallé 105, 2100 Copenhagen, Denmark.  
[E-mail: ahg@nfa.dk]

**Supplementary table 1. Sleep duration and quality.**

| Inter-vention | Night/Rec. | Day | PSD (h:mm) |        | TST (h:mm) |        | Premature awakening |       | Difficulty falling asleep |       | Difficulty of awakening |       | Non-refreshing sleep |       | Disturbed sleep |       | No. of awakenings |       | Sleep quality |       | Sleep onset (hh:mm) |      |
|---------------|------------|-----|------------|--------|------------|--------|---------------------|-------|---------------------------|-------|-------------------------|-------|----------------------|-------|-----------------|-------|-------------------|-------|---------------|-------|---------------------|------|
|               |            |     | Avg        | (SD)   | Avg        | (SD)   | Avg                 | (SD)  | Avg                       | (SD)  | Avg                     | (SD)  | Avg                  | (SD)  | Avg             | (SD)  | Avg               | (SD)  | Avg           | (SD)  | Avg                 | (SD) |
| 2+2           | Night      | 1   | 05:03      | (1:25) | 05:46      | (1:37) | 2.2                 | (1.2) | 1.2                       | (0.5) | 2.4                     | (0.8) | 3.2                  | (0.9) | 1.9             | (0.9) | 2.5               | (1.1) | 2.2           | (0.8) | 89                  | 6,3  |
| 2+2           | Night      | 2   | 04:25      | (1:16) | 05:04      | (1:30) | 2.0                 | (1.2) | 1.5                       | (0.7) | 2.8                     | (1.0) | 3.5                  | (0.9) | 1.8             | (0.9) | 2.2               | (1.1) | 2.2           | (0.9) | 89                  | 6,6  |
| 2+2           | Rec.       | 1   | 07:02      | (1:36) | 07:00      | (1:50) | 1.8                 | (1.0) | 2.0                       | (1.1) | 2.7                     | (1.0) | 3.0                  | (0.9) | 2.0             | (1.0) | 2.7               | (1.3) | 2.2           | (1.0) | 88                  | 7,5  |
| 2+2           | Rec.       | 2   | 06:35      | (1:20) | 06:46      | (1:28) | 1.5                 | (0.8) | 1.8                       | (1.1) | 2.6                     | (0.9) | 2.9                  | (1.0) | 1.8             | (0.7) | 2.2               | (1.1) | 2.1           | (0.9) | 87                  | 8,0  |
| 4+4           | Night      | 1   | 05:15      | (1:37) | 05:58      | (1:44) | 2.1                 | (1.1) | 1.4                       | (0.7) | 2.6                     | (1.0) | 3.1                  | (0.9) | 1.9             | (0.9) | 2.8               | (1.0) | 2.3           | (0.8) | 88                  | 9,5  |
| 4+4           | Night      | 2   | 05:18      | (1:21) | 05:54      | (1:32) | 2.2                 | (1.0) | 1.4                       | (0.7) | 2.4                     | (0.8) | 3.0                  | (0.8) | 1.8             | (0.8) | 2.6               | (1.2) | 2.1           | (0.7) | 88                  | 7,8  |
| 4+4           | Night      | 3   | 05:32      | (1:16) | 05:57      | (1:21) | 2.1                 | (1.2) | 1.4                       | (0.6) | 2.3                     | (0.8) | 3.1                  | (0.9) | 2.0             | (1.0) | 2.8               | (1.2) | 2.2           | (0.8) | 88                  | 7,1  |
| 4+4           | Night      | 4   | 04:35      | (1:09) | 05:08      | (1:18) | 1.9                 | (1.2) | 1.5                       | (0.8) | 2.9                     | (1.0) | 3.4                  | (0.9) | 1.7             | (0.9) | 2.2               | (1.2) | 2.1           | (0.9) | 87                  | 7,4  |
| 4+4           | Rec.       | 1   | 06:49      | (1:39) | 06:53      | (1:37) | 1.8                 | (1.1) | 1.9                       | (1.1) | 2.6                     | (1.1) | 2.9                  | (1.0) | 2.0             | (1.1) | 2.7               | (1.4) | 2.3           | (1.1) | 88                  | 8,3  |
| 4+4           | Rec.       | 2   | 06:20      | (1:33) | 06:31      | (1:33) | 1.6                 | (1.0) | 1.9                       | (1.1) | 2.8                     | (1.2) | 3.0                  | (1.1) | 2.1             | (1.0) | 2.5               | (1.3) | 2.2           | (1.0) | 85                  | 9,1  |
| 4+4           | Rec.       | 3   | 06:38      | (1:25) | 06:50      | (1:29) | 1.7                 | (1.0) | 1.9                       | (1.0) | 2.5                     | (1.0) | 2.7                  | (0.9) | 1.7             | (0.9) | 2.4               | (1.3) | 2.1           | (0.9) | 87                  | 6,8  |
| 4+4           | Rec.       | 4   | 06:45      | (1:44) | 06:48      | (1:43) | 1.5                 | (0.7) | 1.8                       | (1.0) | 2.3                     | (0.9) | 2.6                  | (1.0) | 1.7             | (0.8) | 2.3               | (1.1) | 1.9           | (0.7) | 87                  | 11,5 |
| 7+7           | Night      | 1   | 05:20      | (1:29) | 06:01      | (1:27) | 2.3                 | (1.2) | 1.4                       | (0.7) | 2.2                     | (0.8) | 3.1                  | (0.9) | 2.1             | (0.9) | 2.7               | (1.2) | 2.3           | (0.9) | 88                  | 7,1  |
| 7+7           | Night      | 2   | 05:26      | (1:25) | 05:57      | (1:22) | 2.0                 | (1.1) | 1.3                       | (0.6) | 2.2                     | (0.7) | 3.0                  | (0.8) | 1.8             | (0.8) | 2.4               | (1.2) | 2.3           | (0.8) | 90                  | 6,2  |
| 7+7           | Night      | 3   | 05:12      | (1:28) | 05:47      | (1:19) | 2.0                 | (1.1) | 1.4                       | (0.7) | 2.4                     | (0.9) | 3.1                  | (1.0) | 2.0             | (0.9) | 2.5               | (1.2) | 2.4           | (0.8) | 89                  | 7,2  |
| 7+7           | Night      | 4   | 05:26      | (1:19) | 06:00      | (1:24) | 2.0                 | (1.0) | 1.4                       | (0.6) | 2.4                     | (0.7) | 3.0                  | (0.8) | 1.8             | (0.8) | 2.6               | (1.2) | 2.2           | (0.8) | 88                  | 8,5  |

|     |       |   |              |              |           |           |           |           |           |           |           |    |      |
|-----|-------|---|--------------|--------------|-----------|-----------|-----------|-----------|-----------|-----------|-----------|----|------|
| 7+7 | Night | 5 | 05:27 (1:29) | 06:04 (1:21) | 1.9 (1.1) | 1.4 (0.7) | 2.4 (0.9) | 3.0 (0.8) | 1.7 (0.9) | 2.4 (1.1) | 2.1 (0.7) | 89 | 6,9  |
| 7+7 | Night | 6 | 05:26 (1:26) | 05:50 (1:28) | 1.9 (1.0) | 1.6 (0.9) | 2.5 (1.0) | 3.1 (0.9) | 1.7 (0.7) | 2.5 (1.2) | 2.1 (0.8) | 87 | 8,7  |
| 7+7 | Night | 7 | 04:05 (1:25) | 04:44 (1:39) | 1.9 (1.2) | 1.8 (1.0) | 3.2 (1.1) | 3.8 (1.0) | 1.8 (0.9) | 2.2 (1.1) | 2.2 (0.8) | 85 | 13,4 |
| 7+7 | Rec.  | 1 | 06:25 (1:49) | 06:27 (1:59) | 2.0 (1.2) | 2.1 (1.3) | 3.0 (1.0) | 3.2 (1.0) | 2.2 (1.1) | 2.7 (1.3) | 2.4 (1.1) | 87 | 7,5  |
| 7+7 | Rec.  | 2 | 06:46 (1:55) | 07:03 (1:58) | 1.7 (0.9) | 1.9 (1.2) | 2.8 (1.0) | 3.0 (1.0) | 2.1 (1.0) | 2.6 (1.3) | 2.1 (0.9) | 89 | 6,6  |
| 7+7 | Rec.  | 3 | 06:40 (1:41) | 06:45 (1:47) | 1.6 (1.0) | 1.7 (1.0) | 2.7 (1.0) | 2.9 (0.9) | 1.9 (0.9) | 2.5 (1.1) | 2.1 (0.9) | 87 | 7,8  |
| 7+7 | Rec.  | 4 | 06:14 (1:28) | 06:20 (1:33) | 1.6 (0.9) | 1.6 (0.9) | 2.7 (1.0) | 3.0 (1.0) | 1.9 (1.0) | 2.3 (1.2) | 2.2 (1.0) | 87 | 8,0  |
| 7+7 | Rec.  | 5 | 06:33 (1:31) | 06:47 (1:44) | 1.6 (0.8) | 1.6 (0.8) | 2.7 (0.9) | 2.8 (0.9) | 1.6 (0.7) | 2.3 (1.1) | 2.0 (0.8) | 88 | 7,4  |
| 7+7 | Rec.  | 6 | 06:37 (1:15) | 06:48 (1:32) | 1.6 (0.8) | 1.7 (0.9) | 2.3 (0.9) | 2.7 (1.1) | 1.7 (0.8) | 2.4 (1.2) | 2.0 (0.9) | 87 | 8,1  |
| 7+7 | Rec.  | 7 | 07:06 (1:41) | 07:09 (1:57) | 1.5 (0.7) | 1.7 (0.9) | 2.5 (0.9) | 2.5 (0.9) | 1.8 (1.0) | 2.4 (1.2) | 2.0 (0.9) | 87 | 5,8  |

Average (avg) and standard deviation (SD) of 26 days in the three different work schedules (2+2, 4+4 and 7+7) of consecutive night shifts followed by consecutive recovery (rec.) days based on 73 police officers. Difficulty falling asleep, sleep quality, disturbed sleep, premature awakening number of awakenings, difficulty of awakening, non-refreshing sleep were all measured on a scale ranging from 1-5 with higher scores representing poorer sleep. Primary sleep duration (PSD), total sleep time (incl. naps.; TST) and sleep efficiency were assessed by actigraphy.
